# Supplementary material for: Electrospinning-based construction of porous Mn3O4/CNFs as anodes for high-performance lithium-ion batteries
Source: Royal Society of Chemistry journal article supplement (doi:10.1039/c9nj06296c), 2020-01-01
Supplement: c9nj06296c1.pdf [file c9nj06296c1.pdf]

## Electronic Supplementary Information (ESI)

### Electrospinning-based Construction of Porous $\text{Mn}_3\text{O}_4/\text{CNFs}$ as Anode for High-Performance Lithium-ion Batteries

Ye Li, Yan Song, He Wang, Wensheng Yu, Jinxian Wang, Xiangting Dong,\* Guixia Liu and Qianli Ma

School of Chemistry and Environmental Engineering, Changchun University of Science and Technology, Changchun, 130022, China.

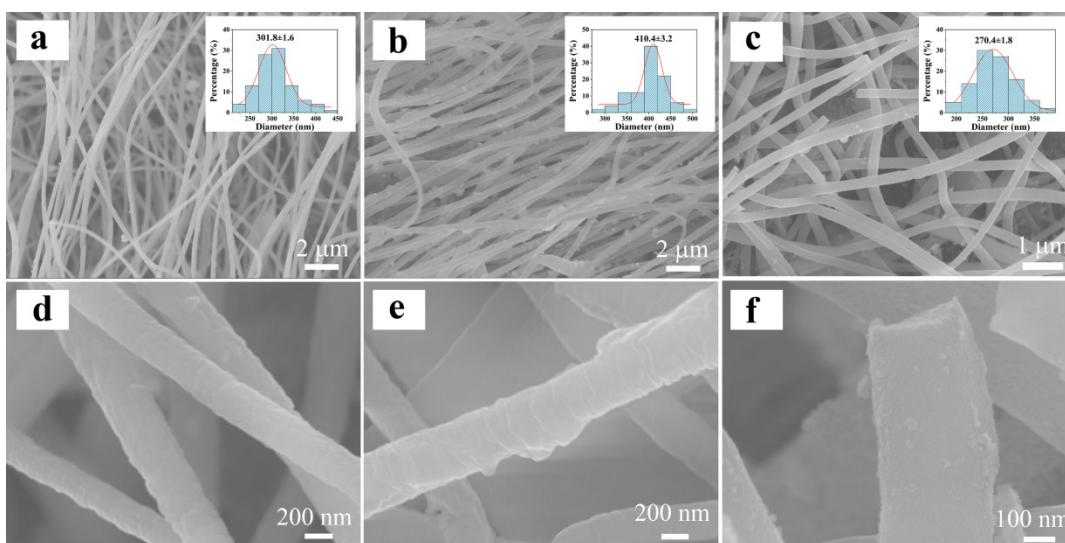

Figure S1 FE-SEM images of (a, d)  $\text{H}_3\text{BTC}/\text{PAN}-1$ , (b, e)  $\text{Mn-MOF}/\text{PANs}-1$ , (c, f)  $\text{Mn}_3\text{O}_4/\text{CNFs}-1$ . The inset of a, b, c show the corresponding diameter distributions.

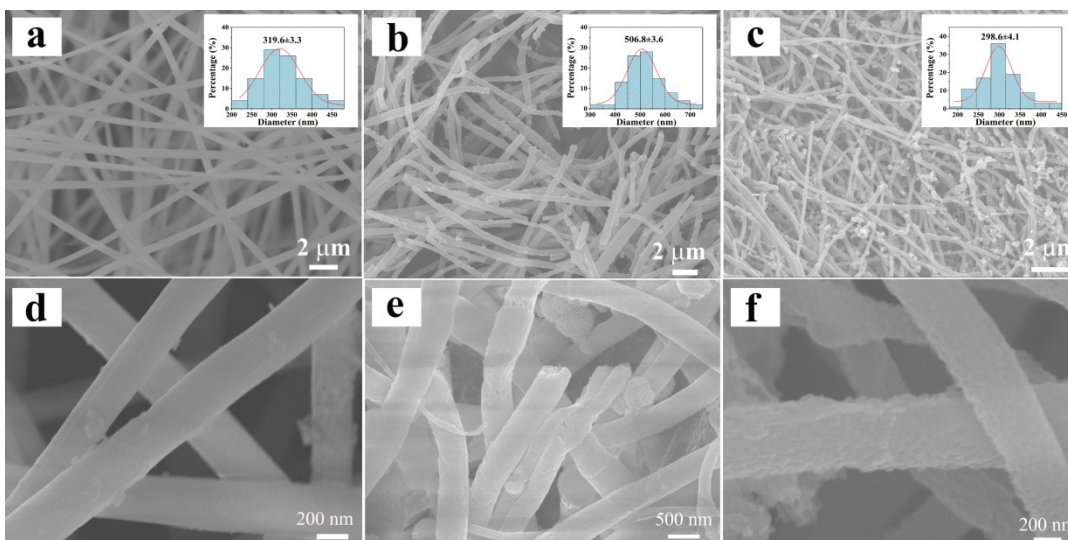

Figure S2 FE-SEM images of (a, d)  $\text{H}_3\text{BTC}/\text{PAN}-3$ , (b, e)  $\text{Mn-MOF}/\text{PANs}-3$ , (c, f)  $\text{Mn}_3\text{O}_4/\text{CNFs}-3$ . The inset of a, b, c show the corresponding diameter distributions.

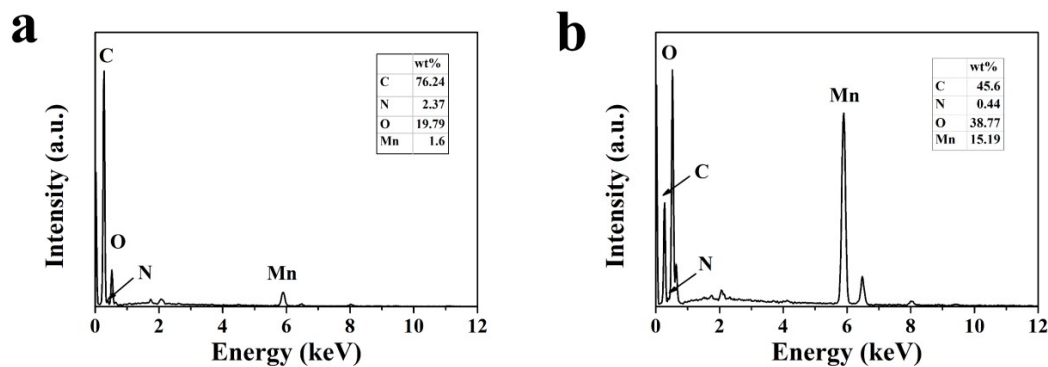

Figure S3 EDS spectrum of (a)  $\text{Mn}_3\text{O}_4/\text{CNFs-1}$ , (b)  $\text{Mn}_3\text{O}_4/\text{CNFs-3}$ .

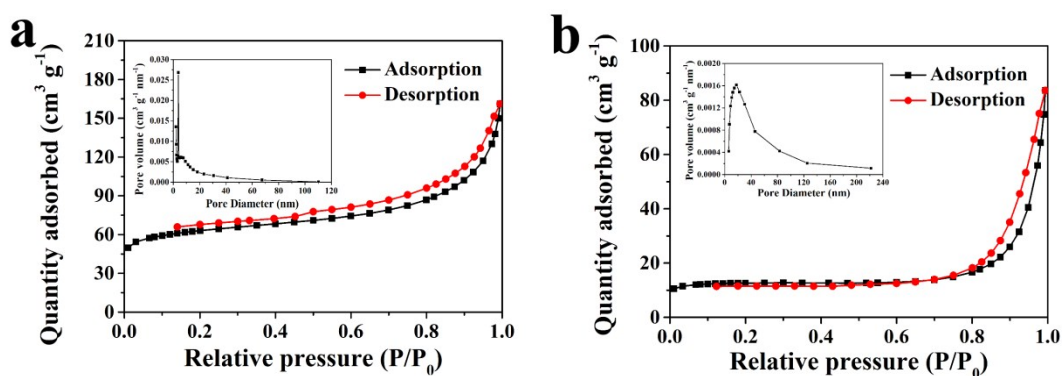

Figure S4  $\text{N}_2$  adsorption-desorption isotherms of (a)  $\text{Mn}_3\text{O}_4/\text{CNFs-1}$ , (b)  $\text{Mn}_3\text{O}_4/\text{CNFs-3}$ , the inset of a, b are pore size distribution curves of  $\text{Mn}_3\text{O}_4/\text{CNFs-1}$ ,  $\text{Mn}_3\text{O}_4/\text{CNFs-3}$  respectively.

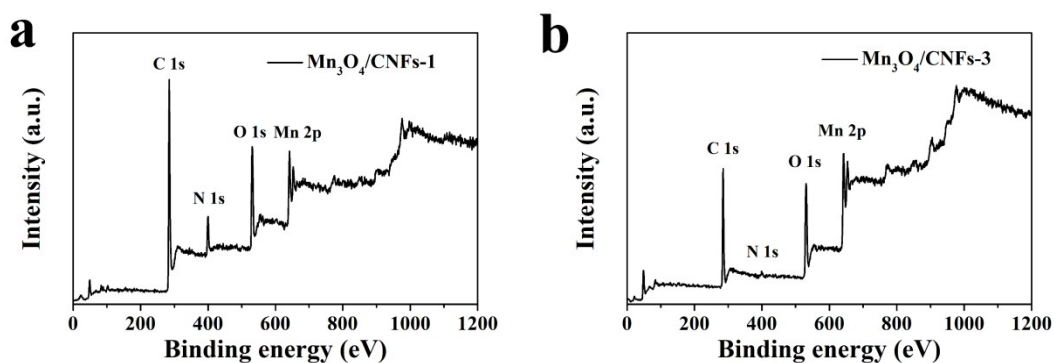

Figure S5 survey XPS spectrum of (a)  $\text{Mn}_3\text{O}_4/\text{CNFs-1}$ , (b)  $\text{Mn}_3\text{O}_4/\text{CNFs-1}$ .

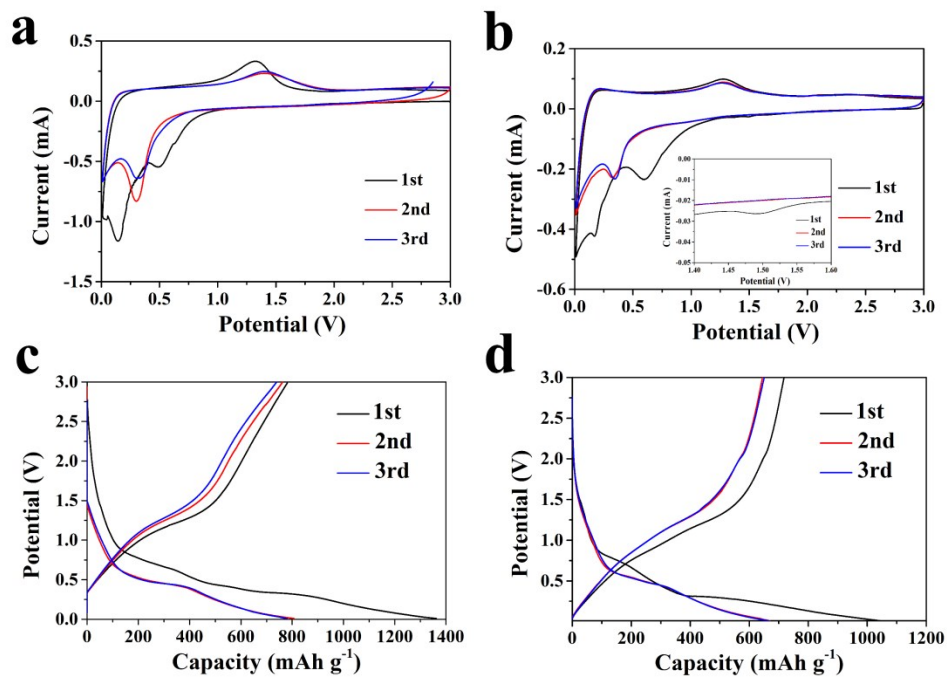

Figure S6 First three consecutive CVs at a scan rate of 0.1 mV s<sup>-1</sup> (a) Mn<sub>3</sub>O<sub>4</sub>/CNFs-1 electrode, (b) Mn<sub>3</sub>O<sub>4</sub>/CNFs-3 electrode, Galvanostatic charge-discharge profiles of the first three cycles at a current density of 0.1 A g<sup>-1</sup> (c) Mn<sub>3</sub>O<sub>4</sub>/CNFs-1 electrode, (d) Mn<sub>3</sub>O<sub>4</sub>/CNFs-3 electrode.

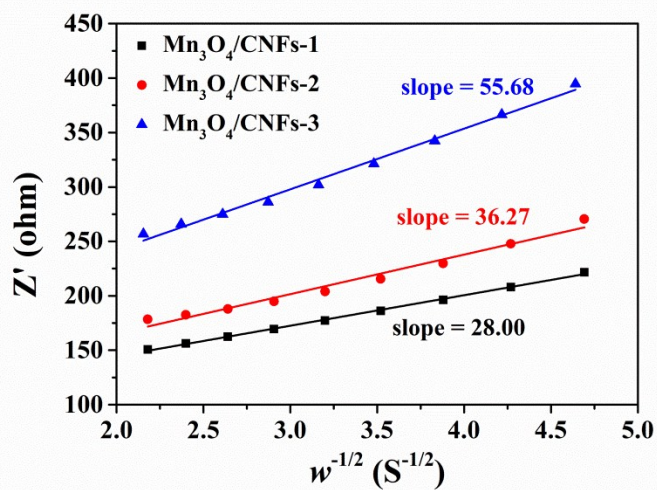

Figure S7 The relationships between Z' and  $\omega^{-1/2}$  in low frequency region.

Table S1 Comparison of lithium storage performance of porous Mn<sub>3</sub>O<sub>4</sub>/CNFs-2 electrode with other Mn<sub>3</sub>O<sub>4</sub>-based electrodes

| Materials                                            | First discharge-charge capacity (mAh g <sup>-1</sup> ) | Capacity retention (mAh g <sup>-1</sup> ) | Ref.      |
|------------------------------------------------------|--------------------------------------------------------|-------------------------------------------|-----------|
| Porous Mn <sub>3</sub> O <sub>4</sub> /CNFs-2        | 1732/1021 (0.1A g <sup>-1</sup> )                      | 1000 (232 cycle) 754 (400 cycle)          | This work |
| ysMnO <sub>x</sub> /NC                               | 1204/878 (0.1A g <sup>-1</sup> )                       | 884 (100 cycle)                           | 1         |
| Mn <sub>3</sub> O <sub>4</sub> /C                    | 1505/879 (0.1 A g <sup>-1</sup> )                      | 870 (100 cycle)                           | 2         |
| micro/nanocuboids                                    | 1180/767 (0.5 A g <sup>-1</sup> )                      | 785 (200 cycle) 711 (500 cycle)           | 2         |
| Mn <sub>3</sub> O <sub>4</sub> polyhedron@C          | 2057.1/1254.1 (0.1 A g <sup>-1</sup> )                 | 885.5 (200 cycle)                         | 3         |
| Zn <sub>x</sub> MnO@C HHNDs                          | 1565.9/954.6 (0.1 A g <sup>-1</sup> )                  | 1050 (200 cycle)                          | 4         |
| Mn <sub>3</sub> O <sub>4</sub> @C                    | 1223.6/844.7 (0.25 A g <sup>-1</sup> )                 | 730.2 (200 cycle)                         | 5         |
| CNFs/Mn <sub>3</sub> O <sub>4</sub>                  | 1690/937 (0.1 A g <sup>-1</sup> )                      | 760 (50 cycle)                            | 6         |
| rGO/Mn <sub>3</sub> O <sub>4</sub>                   | 1271/802 (0.1 A g <sup>-1</sup> )                      | 702 (100 cycle)                           | 7         |
| Ce-doped Mn <sub>3</sub> O <sub>4</sub>              | 1220.8/795.9 (0.1 A g <sup>-1</sup> )                  | 754.2 (100 cycle)                         | 8         |
| PC-Mn <sub>3</sub> O <sub>4</sub>                    | 1412.2/629.5 (0.1 C)                                   | 805.2 (200 cycle)                         | 9         |
| N-doped porous carbon/Mn <sub>3</sub> O <sub>4</sub> | 2015/1090 (0.1 A g <sup>-1</sup> )                     | 806 (120 cycle)                           | 10        |

#### References

- 1 Cheng Yang, Yu Yao, Yuebin Lian, Yujie Chen, Rahim Shah, Xiaohui Zhao, Muzi Chen, Yang Peng, Zhao Deng, *Small*, 2019, 15(16): 1900015.
- 2 Yao Jiang, JiLi Yue, Qiubo Guo, Qiuying Xia, Chong Zhou, Tao Feng, Jing Xu, Hui Xia, *Small*, 2018, 14(19): 1704296.
- 3 Mingyue Wang, Ying Huang, Na Zhang, Ke Wang, Xuefang Chen, Xiao Ding, *Chemical Engineering Journal*, 2018, 334(15): 2383-2391.
- 4 Dong Wng, Weiwei Zhou, Rui Zhang, Xiaoxiao Huang, Jinjue Zeng, Yanfang Mao, Chunyan Ding, Jian Zhang, Jinping Liu, Guangwu Wen, *Journal of Materials Chemistry A*, 2018, 6: 2974-2983.
- 5 Jie Zhang, Ruixia Chu, Yanli Chen, Yibo Zeng, Ying Zhang, Hang Guo, *Electrochimica Acta*, 2019, 319: 518-526.
- 6 Seok-Hwan Park, Wan-Jin Lee, *Journal of Power Sources*, 2015, 281: 301-309.
- 7 Jiangan Wang, Dandan Jin, Rui Zhou, Xu Li, Xingrui Liu, Chao Shen, Keyu Xie, Baohua Li, Feiyu Kang, Bingqing Wei, *ACS Nano*, 2016, 10(6): 6227-6234.
- 8 Xiaoyan Han, Yiping Cui, Haowen Liu, *Journal of Alloys and Compounds*, 2020, 814(25): 152348.
- 9 M. Shaheer Akhtar, Phuong T.M. Bui, Zhen-Yu Li, O-Bong Yang, Baboo Joseph Paul, Sungjin Kim, Jaekook Kim, Alok Kumar Rai, *Solid State Ionics*, 2019, 336: 31-38.
- 10 Jie Shan, Jianjiao Wang, YunZhao, Jiejie Huang, *Solid State Sciences*, 2019, 92, 89-95.
